# Supplementary material for: Prioritising Risk Factors for Prescription Drug Overdose among Older Adults in South Korea: A Multi-Method Study
Source: Int J Environ Res Public Health. 2021 Jun 1;18(11):5948. doi: 10.3390/ijerph18115948 (PMC8198076; doi:10.3390/ijerph18115948)
Supplement: Supplementary file 1 [file ijerph-18-05948-s001.zip › ijerph-1192239-supplementary.pdf]

**Table S1.** ICD-10 code for prescription drug overdose.

| ICD-10 code | Diagnosis                                                                  |
|-------------|----------------------------------------------------------------------------|
| T36         | Poisoning by systemic antibiotics                                          |
| T36.0       | Penicillins                                                                |
| T36.1       | Cephalosporins and other $\beta$ -lactam antibiotics                       |
| T36.2       | Chloramphenicol group                                                      |
| T36.3       | Macrolide                                                                  |
| T36.4       | Tetracycline                                                               |
| T36.5       | Aminoglycoside                                                             |
| T36.6       | Rifamycin                                                                  |
| T36.7       | Antifungal antibiotics, systemically used                                  |
| T36.8       | Other systemic antibiotics                                                 |
| T36.9       | Systemic antibiotic, unspecified                                           |
| T37         | Poisoning by other systemic anti-infectives and antiparasitics             |
| T37.0       | Sulfonamide                                                                |
| T37.1       | Antimycobacterial drugs                                                    |
| T37.2       | Antimalarials and drugs acting on other blood protozoa                     |
| T37.3       | Other antiprotozoal drugs                                                  |
| T37.4       | Anthelmintics                                                              |
| T37.5       | Antiviral drugs                                                            |
| T37.8       | Other specified systemic anti-infectives and antiparasitics                |
| T37.9       | Systemic anti-infective and antiparasitic, unspecified                     |
| T38         | Poisoning by hormones and their synthetic substitutes and antagonists, NEC |
| T38.0       | Glucocorticoids and synthetic analogues                                    |
| T38.1       | Thyroid hormones and substitutes                                           |
| T38.2       | Antithyroid drugs                                                          |
| T38.3       | Insulin and oral hypoglycaemic [antidiabetic] drugs                        |
| T38.4       | Oral contraceptives                                                        |
| T38.5       | Other estrogens and progestogens                                           |
| T38.6       | Antigonado- trophins, antiestrogens, antiandrogens, NEC                    |
| T38.7       | Androgens and anabolic congeners                                           |
| T38.8       | Other and unspecified hormonesand their synthetic substitutes              |

|       |                                                                          |
|-------|--------------------------------------------------------------------------|
| T38.9 | Other and unspecified hormone antagonists                                |
| T39   | Poisoning by nonopioid analgesics, antipyretics and antirheumatics       |
| T39.0 | Salicylate                                                               |
| T39.1 | 4-Aminophenol derivatives                                                |
| T39.2 | Pyrazolone derivatives                                                   |
| T39.3 | Other nonsteroidal anti-inflammatory drugs [NSAID]                       |
| T39.4 | Antirheumatics, NEC                                                      |
| T39.8 | Other nonopioid analgesics, antipyretics, NEC                            |
| T39.9 | Nonopioid analgesics, antipyretics and antirheumatic, unspecified        |
| T40   | Poisoning by narcotics and psychodysleptics [hallucinogens]              |
| T40.0 | Opium                                                                    |
| T40.1 | Heroin                                                                   |
| T40.2 | Other opioids                                                            |
| T40.3 | Methadone                                                                |
| T40.4 | Other synthetic narcotics                                                |
| T40.5 | Cocaine                                                                  |
| T40.6 | Other and unspecified narcotics                                          |
| T40.7 | Cannabis (derivatives)                                                   |
| T40.8 | Lysergide [LSD]                                                          |
| T40.9 | Other and unspecified psychodysleptics [hallucinogens]                   |
| T41   | Poisoning by anaesthetics and therapeutic gases                          |
| T41.0 | Inhaled anaesthetics                                                     |
| T41.1 | Intravenous anaesthetics                                                 |
| T41.2 | Other and unspecified general anaesthetics                               |
| T41.3 | Local anaesthetics                                                       |
| T41.4 | Anaesthetic, unspecified                                                 |
| T41.5 | Therapeutic gases                                                        |
| T42   | Poisoning by antiepileptic, sedative-hypnotic and antiparkinsonism drugs |
| T42.0 | Hydantoin derivatives                                                    |
| T42.1 | Iminostilbenes                                                           |
| T42.2 | Succinimide and oxazolidinedione                                         |
| T42.3 | Barbiturate                                                              |
| T42.4 | Benzodiazepine                                                           |

|       |                                                                                       |
|-------|---------------------------------------------------------------------------------------|
| T42.5 | Mixed antiepileptics, NEC                                                             |
| T42.6 | Other antiepileptic and sedative-hypnotic drugs                                       |
| T42.7 | Antiepileptic and sedative-hypnotic drugs, unspecified                                |
| T42.8 | Antiparkinsonism drugs and other central muscle-tone depressants                      |
| T43   | Poisoning by psychotropic drugs, NEC                                                  |
| T43.0 | Tricyclic and tetracyclic antidepressants                                             |
| T43.1 | Monoamine-oxidase-inhibitor antidepressants                                           |
| T43.2 | Other and unspecified antidepressants                                                 |
| T43.3 | Phenothiazine antipsychotics and neuroleptics                                         |
| T43.4 | Butyrophenone and thiothixene neuroleptics                                            |
| T43.5 | Other and unspecified antipsychotics and neuroleptics                                 |
| T43.6 | Psychostimulants with abuse potential                                                 |
| T43.8 | Other psychotropic drugs, NEC                                                         |
| T43.9 | Psychotropic drug, unspecified                                                        |
| T44   | Poisoning by drugs primarily affecting the autonomic nervous system                   |
| T44.0 | Anticholinesterase agents                                                             |
| T44.1 | Other parasympathomimetics [cholinergics]                                             |
| T44.2 | Ganglionic blocking drugs, NEC                                                        |
| T44.3 | Other parasympatholytics [anticholinergics and antimuscarinics] and spasmolytics, NEC |
| T44.4 | Predominantly $\alpha$ -adrenoreceptor agonists, NEC                                  |
| T44.5 | Predominantly $\beta$ -adrenoreceptor agonists, NEC                                   |
| T44.6 | $\alpha$ -Adrenoreceptor antagonists, NEC                                             |
| T44.7 | $\beta$ -Adrenoreceptor antagonists, NEC                                              |
| T44.8 | Centrally acting and adrenergic-neuron-blocking agents, NEC                           |
| T44.9 | Other and unspecified drugs primarily affecting the autonomic nervous system          |
| T45   | Poisoning by primarily systemic and haematological agents, NEC                        |
| T45.0 | Antiallergic and antiemetic drugs                                                     |
| T45.1 | Antineoplastic and immunosuppressive drugs                                            |
| T45.2 | Vitamins, NEC                                                                         |
| T45.3 | Enzymes, NEC                                                                          |
| T45.4 | Iron and its compounds                                                                |
| T45.5 | Anticoagulants                                                                        |
| T45.6 | Fibrinolysis-affecting drugs                                                          |

|       |                                                                                                |
|-------|------------------------------------------------------------------------------------------------|
| T45.7 | Anticoagulant antagonists, vitamin K and other coagulants                                      |
| T45.8 | Other primarily systemic and haematological agents                                             |
| T45.9 | Primarily systemic and haematological agent, unspecified                                       |
| T46   | Poisoning by agents primarily affecting the cardiovascular system                              |
| T46.0 | Cardiac-stimulant glycosides and drugs of similar action                                       |
| T46.1 | Calcium-channel blockers                                                                       |
| T46.2 | Other antidysrhythmic drugs, NEC                                                               |
| T46.3 | Coronary vasodilators, NEC                                                                     |
| T46.4 | Angiotensin-converting-enzyme inhibitors                                                       |
| T46.5 | Other antihypertensive drugs, NEC                                                              |
| T46.6 | Antihyperlipidaemic and antiarteriosclerotic drugs                                             |
| T46.7 | Peripheral vasodilators                                                                        |
| T46.8 | Antivaricose drugs, including sclerosing agents                                                |
| T46.9 | Other and unspecified agents primarily affecting the cardiovascular system                     |
| T47   | Poisoning by agents primarily affecting the gastrointestinal system                            |
| T47.0 | Histamine H2-receptor antagonists                                                              |
| T47.1 | Other antacids and anti-gastric-secretion drugs                                                |
| T47.2 | Stimulant laxatives                                                                            |
| T47.3 | Saline and osmotic laxatives                                                                   |
| T47.4 | Other laxatives                                                                                |
| T47.5 | Digestants                                                                                     |
| T47.6 | Antidiarrhoeal drugs                                                                           |
| T47.7 | Emetics                                                                                        |
| T47.8 | ther agents primarily affecting the gastrointestinal system                                    |
| T47.9 | Agent primarily affecting the gastrointestinal system, unspecified                             |
| T48   | Poisoning by agents primarily acting on smooth and skeletal muscles and the respiratory system |
| T48.0 | Oxytocic drugs                                                                                 |
| T48.1 | Skeletal muscle relaxants [neuromuscular blocking agents]                                      |
| T48.2 | Other and unspecified agents primarily acting on muscles                                       |
| T48.3 | Antitussives                                                                                   |
| T48.4 | Expectorants                                                                                   |
| T48.5 | Anti-common-cold drugs                                                                         |

|       |                                                                                                                                           |
|-------|-------------------------------------------------------------------------------------------------------------------------------------------|
| T48.6 | Antiasthmatics, NEC                                                                                                                       |
| T48.7 | Other and unspecified agents primarily acting on the respiratory system                                                                   |
| T49   | Poisoning by topical agents primarily affecting skin and mucous membrane and by ophthalmological, otorhinolaryngological and dental drugs |
| T49.0 | Local antifungal, anti-infective and anti-inflammatory drugs, NEC                                                                         |
| T49.1 | Antipruritics                                                                                                                             |
| T49.2 | Local astringents and local detergents                                                                                                    |
| T49.3 | Emollients, demulcents and protectants                                                                                                    |
| T49.4 | Keratolytics, keratoplastics and other hair treatment drugs and preparations                                                              |
| T49.5 | Ophthalmological drugs and preparations                                                                                                   |
| T49.6 | Otorhinolaryngological drugs and preparations                                                                                             |
| T49.7 | Dental drugs, topically applied                                                                                                           |
| T49.8 | Other topical agents                                                                                                                      |
| T49.9 | Topical agent, unspecified                                                                                                                |
| T50   | Poisoning by diuretics and other and unspecified drugs, medicaments and biological substances                                             |
| T50.0 | Mineralocorticoids and their antagonists                                                                                                  |
| T50.1 | Loop [high-ceiling] diuretics                                                                                                             |
| T50.2 | Carbonic-anhydrase inhibitors, benzothiadiazides and other diuretics                                                                      |
| T50.3 | Electrolytic, caloric and water-balance agents                                                                                            |
| T50.4 | Drugs affecting uric acid metabolism                                                                                                      |
| T50.5 | Appetite depressants                                                                                                                      |
| T50.6 | Antidotes and chelating agents, NEC                                                                                                       |
| T50.7 | Analeptics and opioid receptor antagonists                                                                                                |
| T50.8 | Diagnostic agents                                                                                                                         |
| T50.9 | Other and unspecified drugs, medicaments and biological substances                                                                        |
